# Supplementary material for: Melanin Nanoparticles Obtained from Preformed Recombinant Melanin by Bottom-Up and Top-Down Approaches
Source: MDPI journal article supplement (doi:10.3390/polym15102381), 2023-05-19
Supplement: s1 [file s1]

## Supplementary Materials

# Melanin Nanoparticles Obtained from Preformed Recombinant Melanin by *Bottom-Up* and *Top-Down* Approaches

Sergio Alcalá-Alcalá <sup>1</sup>, José Eduardo Casarrubias-Anacleto <sup>1</sup>, Maximiliano Mondragón-Guillén <sup>2</sup>, Carlos Alberto Tavira-Montalvan <sup>2</sup>, Marcos Bonilla-Hernández <sup>1</sup>, Diana Lizbeth Gómez-Galicia <sup>3</sup>, Guillermo Gosset <sup>4</sup> and Angélica Meneses-Acosta <sup>2\*</sup>

<sup>1</sup> Laboratorio de Investigación en Tecnología Farmacéutica, Facultad de Farmacia, Universidad Autónoma del Estado de Morelos, Cuernavaca, Morelos, 62209, Mexico; sergio.alcala@uaem.mx ((S.A.-A.); jose.casarrubiasana@uaem.edu.mx (J.E.C.-A.); marcos.bonillahz@gmail.com (M.B.-H.)

<sup>2</sup> Laboratorio de Biotecnología Farmacéutica, Facultad de Farmacia, Universidad Autónoma del Estado de Morelos, Cuernavaca, Morelos, 62209, Mexico; maximiliano.mondragong@uaem.edu.mx (M.M.-G.); carlos.taviramon@uaem.edu.mx (C.A.T.-M.)

<sup>3</sup> Farmacia Hospitalaria, Facultad de Farmacia, Universidad Autónoma del Estado de Morelos, Cuernavaca, Morelos, 62209, Mexico; diana.gomezg@uaem.edu.mx

<sup>4</sup> Departamento de Ingeniería Celular y Biocatálisis, Instituto de Biotecnología, Universidad Nacional Autónoma de México, Cuernavaca, Morelos, 62209, Mexico; guillermo.gosset@ibt.unam.mx

\* Correspondence: angelica\_meneses@uaem.mx; Tel.: +52-7773297000 (ext. 3366)

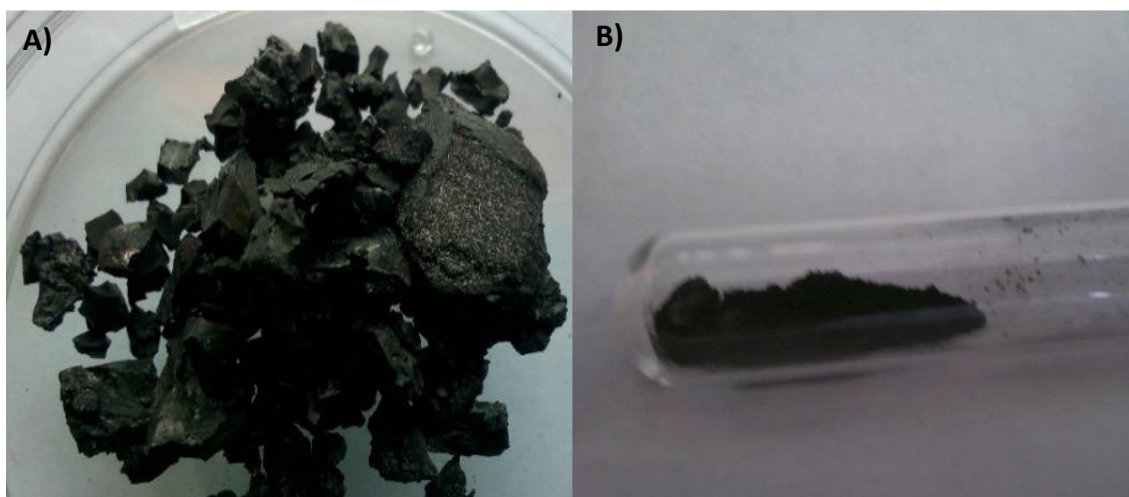

**Figure S1.** Preformed recombinant melanin (PRM); A) granular raw material, B) pulverized raw material.

A) NC Method

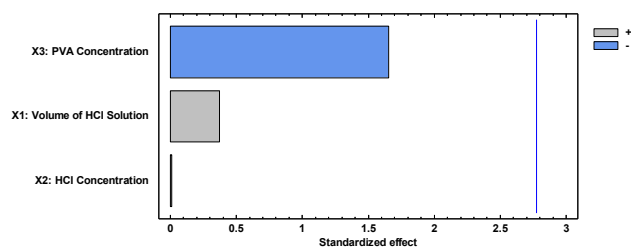

B) ME Method

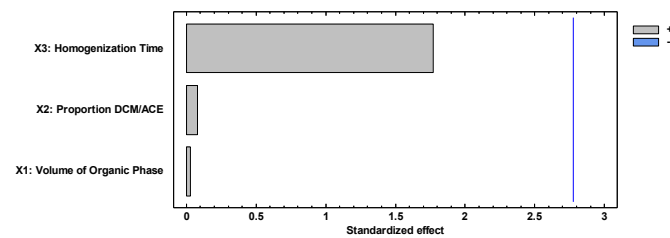

C) HP Method

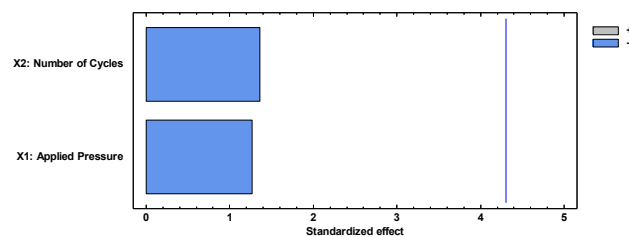

**Figure S2.** Pareto charts of main effects on particle size for the three manufacturing methods employed to produce RMNP; A) Nanocrystallization (NC), B) Double Emulsion - Solvent Evaporation (DE), C) High Pressure Homogenization (HP).

1  
2  
3  
4  
5  
6
